# Supplementary material for: Alirocumab safety in people with and without diabetes mellitus: pooled data from 14 ODYSSEY trials
Source: PubMed Central journal article supplement — Diabet Med. 2018 Oct 9;35(12):1742–51. doi: 10.1111/dme.13817 (PMC6585811; doi:10.1111/dme.13817), 2018-10-09
Supplement: DME-35-1742-s003.pdf [file DME-35-1742-s003.pdf]

**Objective:** To assess the safety of alirocumab versus control (placebo/ezetimibe) in people with hypercholesterolemia with Type 1 or Type 2 diabetes mellitus (DM) versus those without DM

14 Phase 2 and Phase 3 trials of treatment duration ranging 8–104 weeks

Four Phase 2 studies (n=260)  
DFI11565, DFI11566, CL-1003, and DFI12361  
10 Phase 3 ODYSSEY studies (n=4974)

- LONG TERM  
HIGH FH
- FH I  
FH II  
COMBO I  
COMBO II  
OPTIONS I  
OPTIONS II  
MONO  
ALTERNATIVE

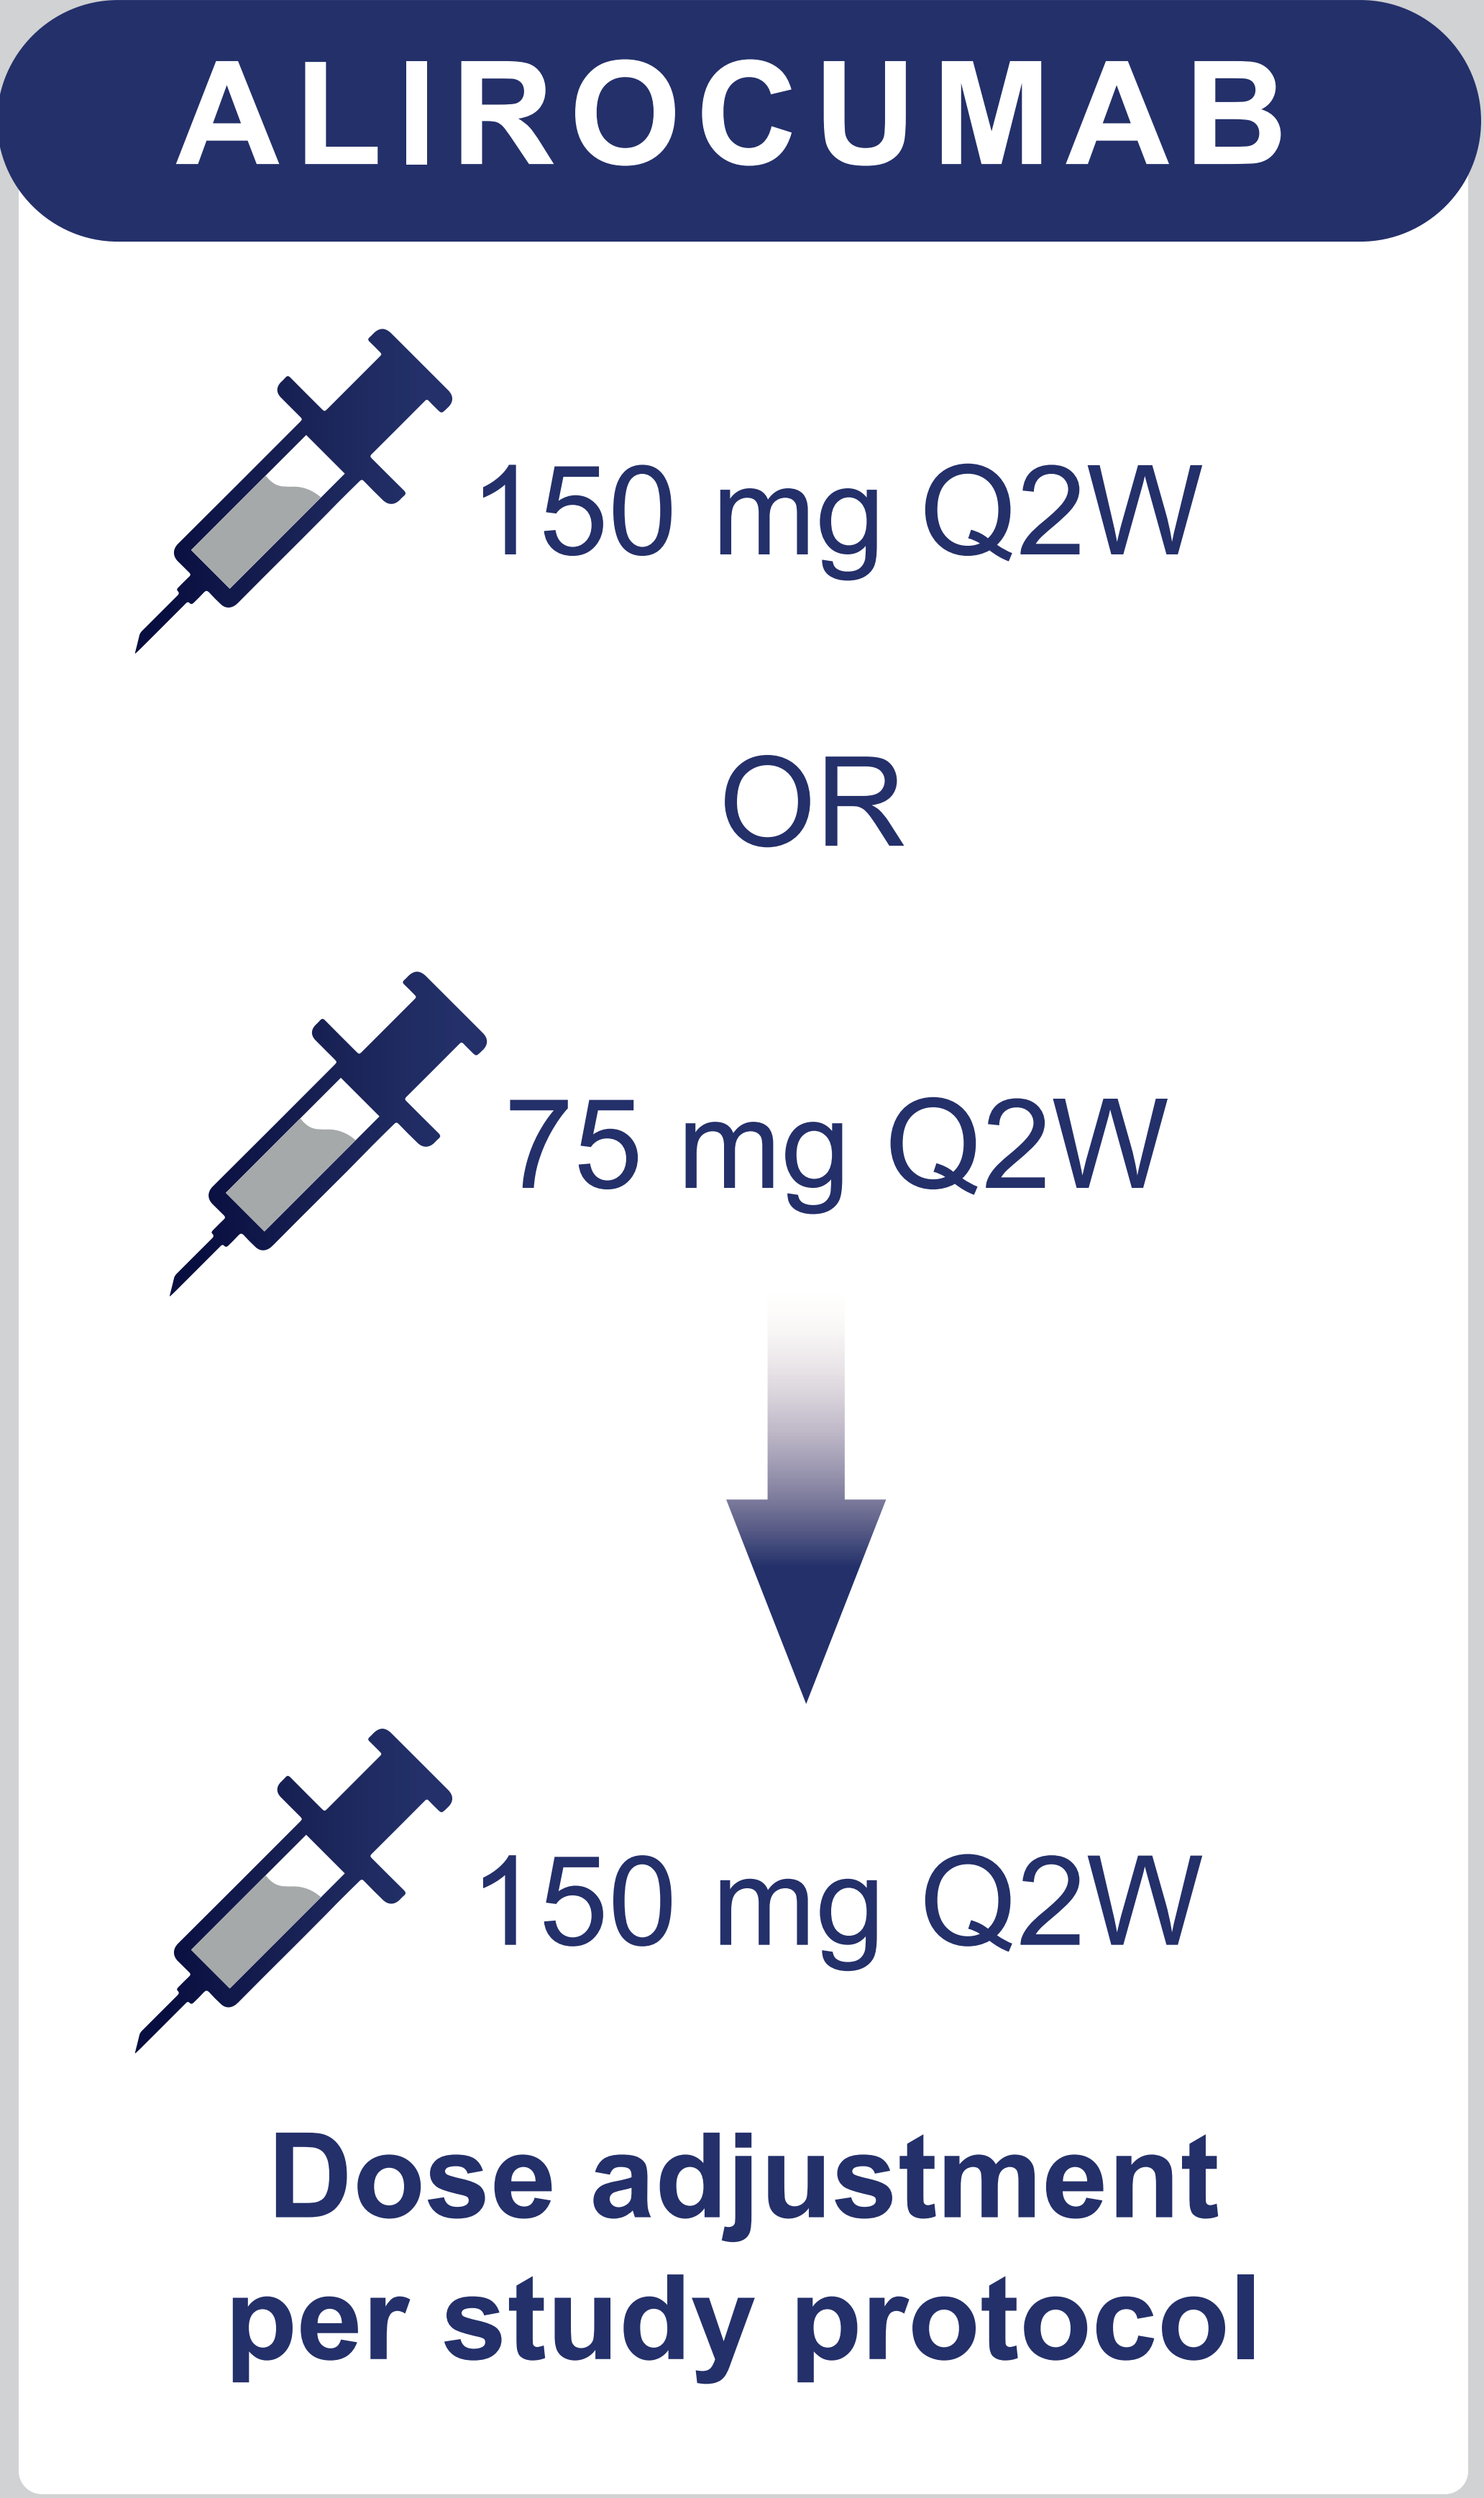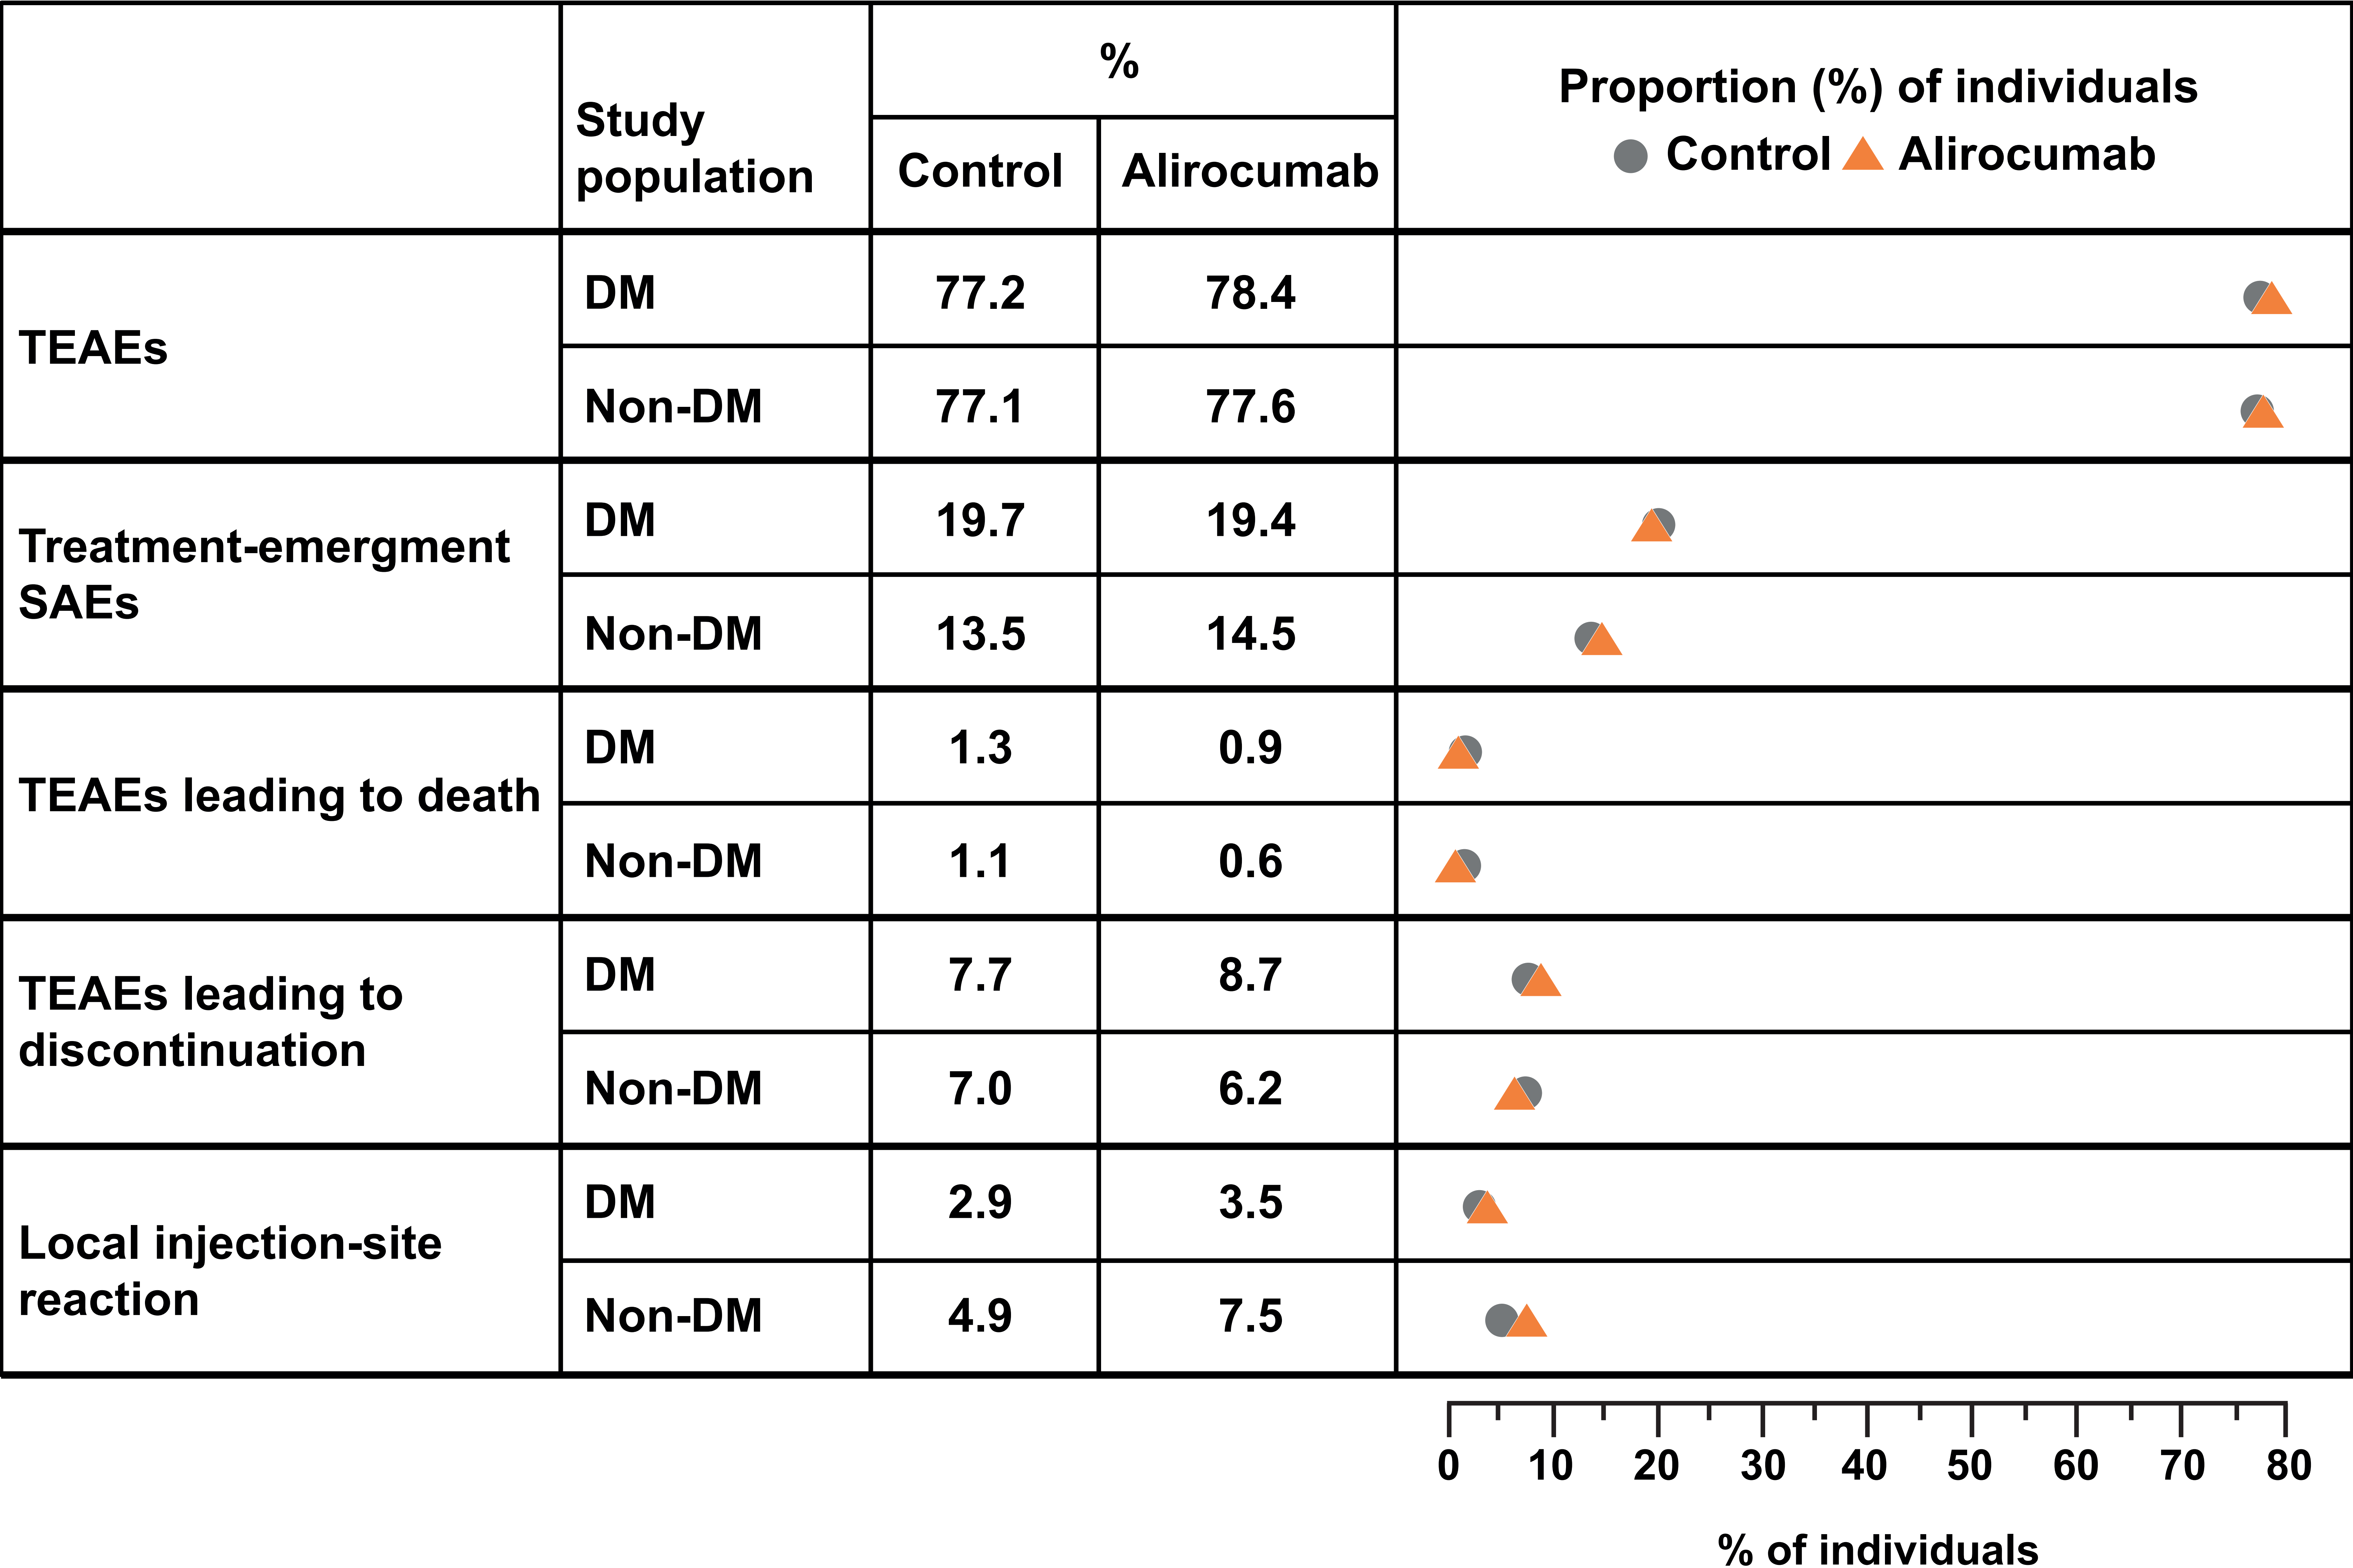

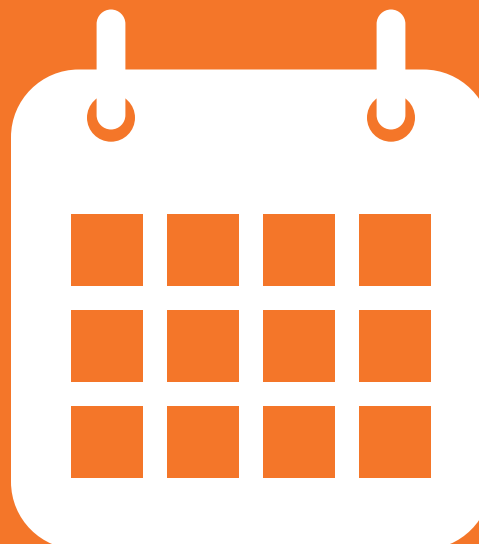

Safety of alirocumab was comparable with control, except for a higher frequency of local injection-site reactions observed with alirocumab versus control, regardless of DM status. No clinically significant changes in glycemic parameters were observed

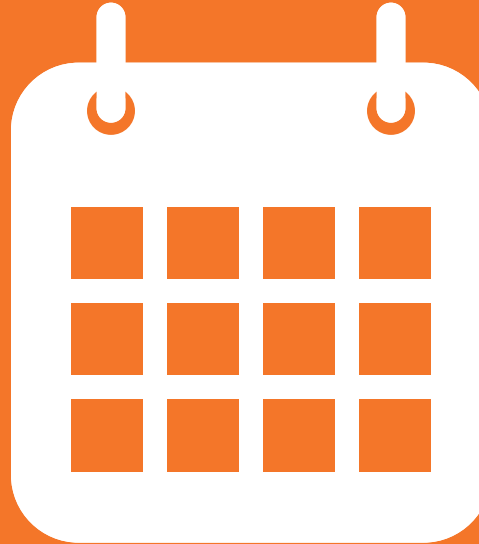

People with DM reported fewer local injection-site reactions than those without. The majority of local injection-site reactions were mild in nature in people with and without DM

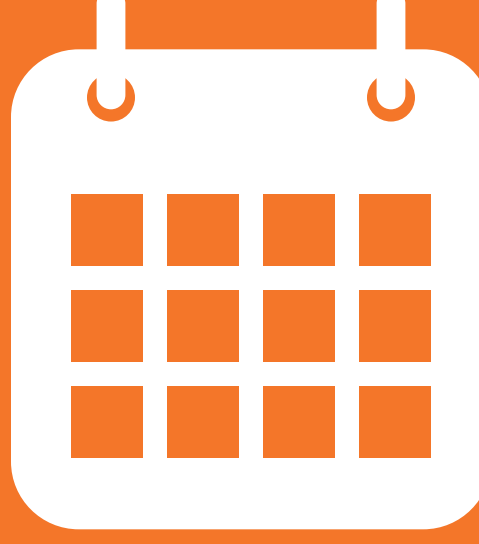

These safety results are consistent with prior findings in the overall ODYSSEY study population
